# Supplementary material
Source: Research Square preprint supplement (doi:10.21203/rs.3.rs-8619015/v1)
Supplement: Supplementary file 1 [file 0ee95878fe335146c5664a4b.docx]

Supporting Information

Phytochemical Profiling of *Aloe koenenii* leaf epidermis by UHPLC-PDA-MS/MS

**Sven Zalewski1,#** [
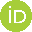
](https://orcid.org/0000-0001-8508-0959)**, Flávio A. Carvalho1,#** [
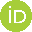
](https://orcid.org/0000-0001-7179-909X)**, Luis V. S. Sacramento1**[
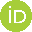
](https://orcid.org/0000-0003-0433-2910)**, Caio H. Perego1**[
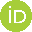
](https://orcid.org/0000-0003-4407-7651)**, Eduardo J. Crevelin2**[
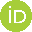
](https://orcid.org/0000-0001-8708-147X)**, Antônio E. M. Crotti2**[
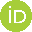
](https://orcid.org/0000-0002-1730-1729)**, André G. Santos*1**[
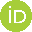
](https://orcid.org/0000-0002-4920-2506)

1São Paulo State University (UNESP), School of Pharmaceutical Sciences, Department of Drugs and Medicines, Araraquara, São Paulo, Brazil

2University of São Paulo (USP), Faculty of Philosophy, Sciences and Letters, Department of Chemistry, Ribeirão Preto, São Paulo, Brazil

*****Corresponding author, e-mail: andre.gonzaga@unesp.br

#These authors contributed equally to this work


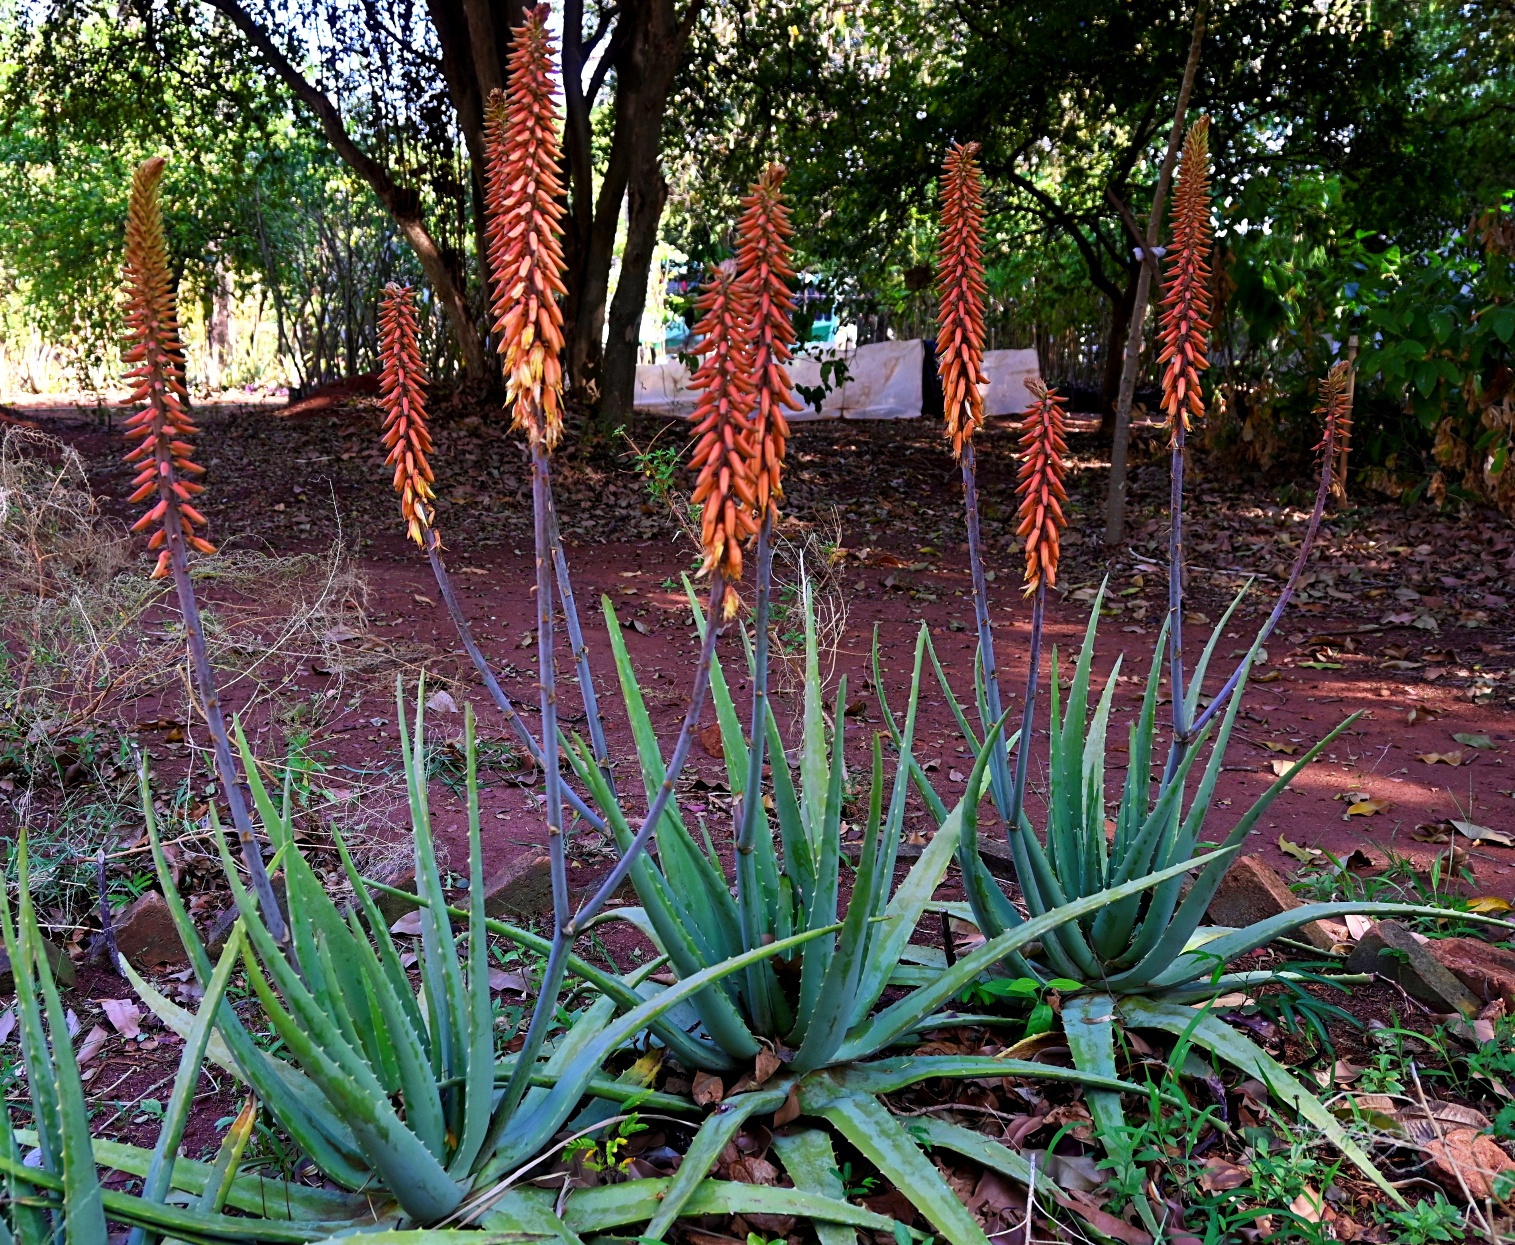


**Figure S1.** *Aloe koenenii* Lavranos & Kerstin Koch Lodé — cultivated plants in flower. Photo: Carolina Leidiádines de Sá Ferreira, 2025.


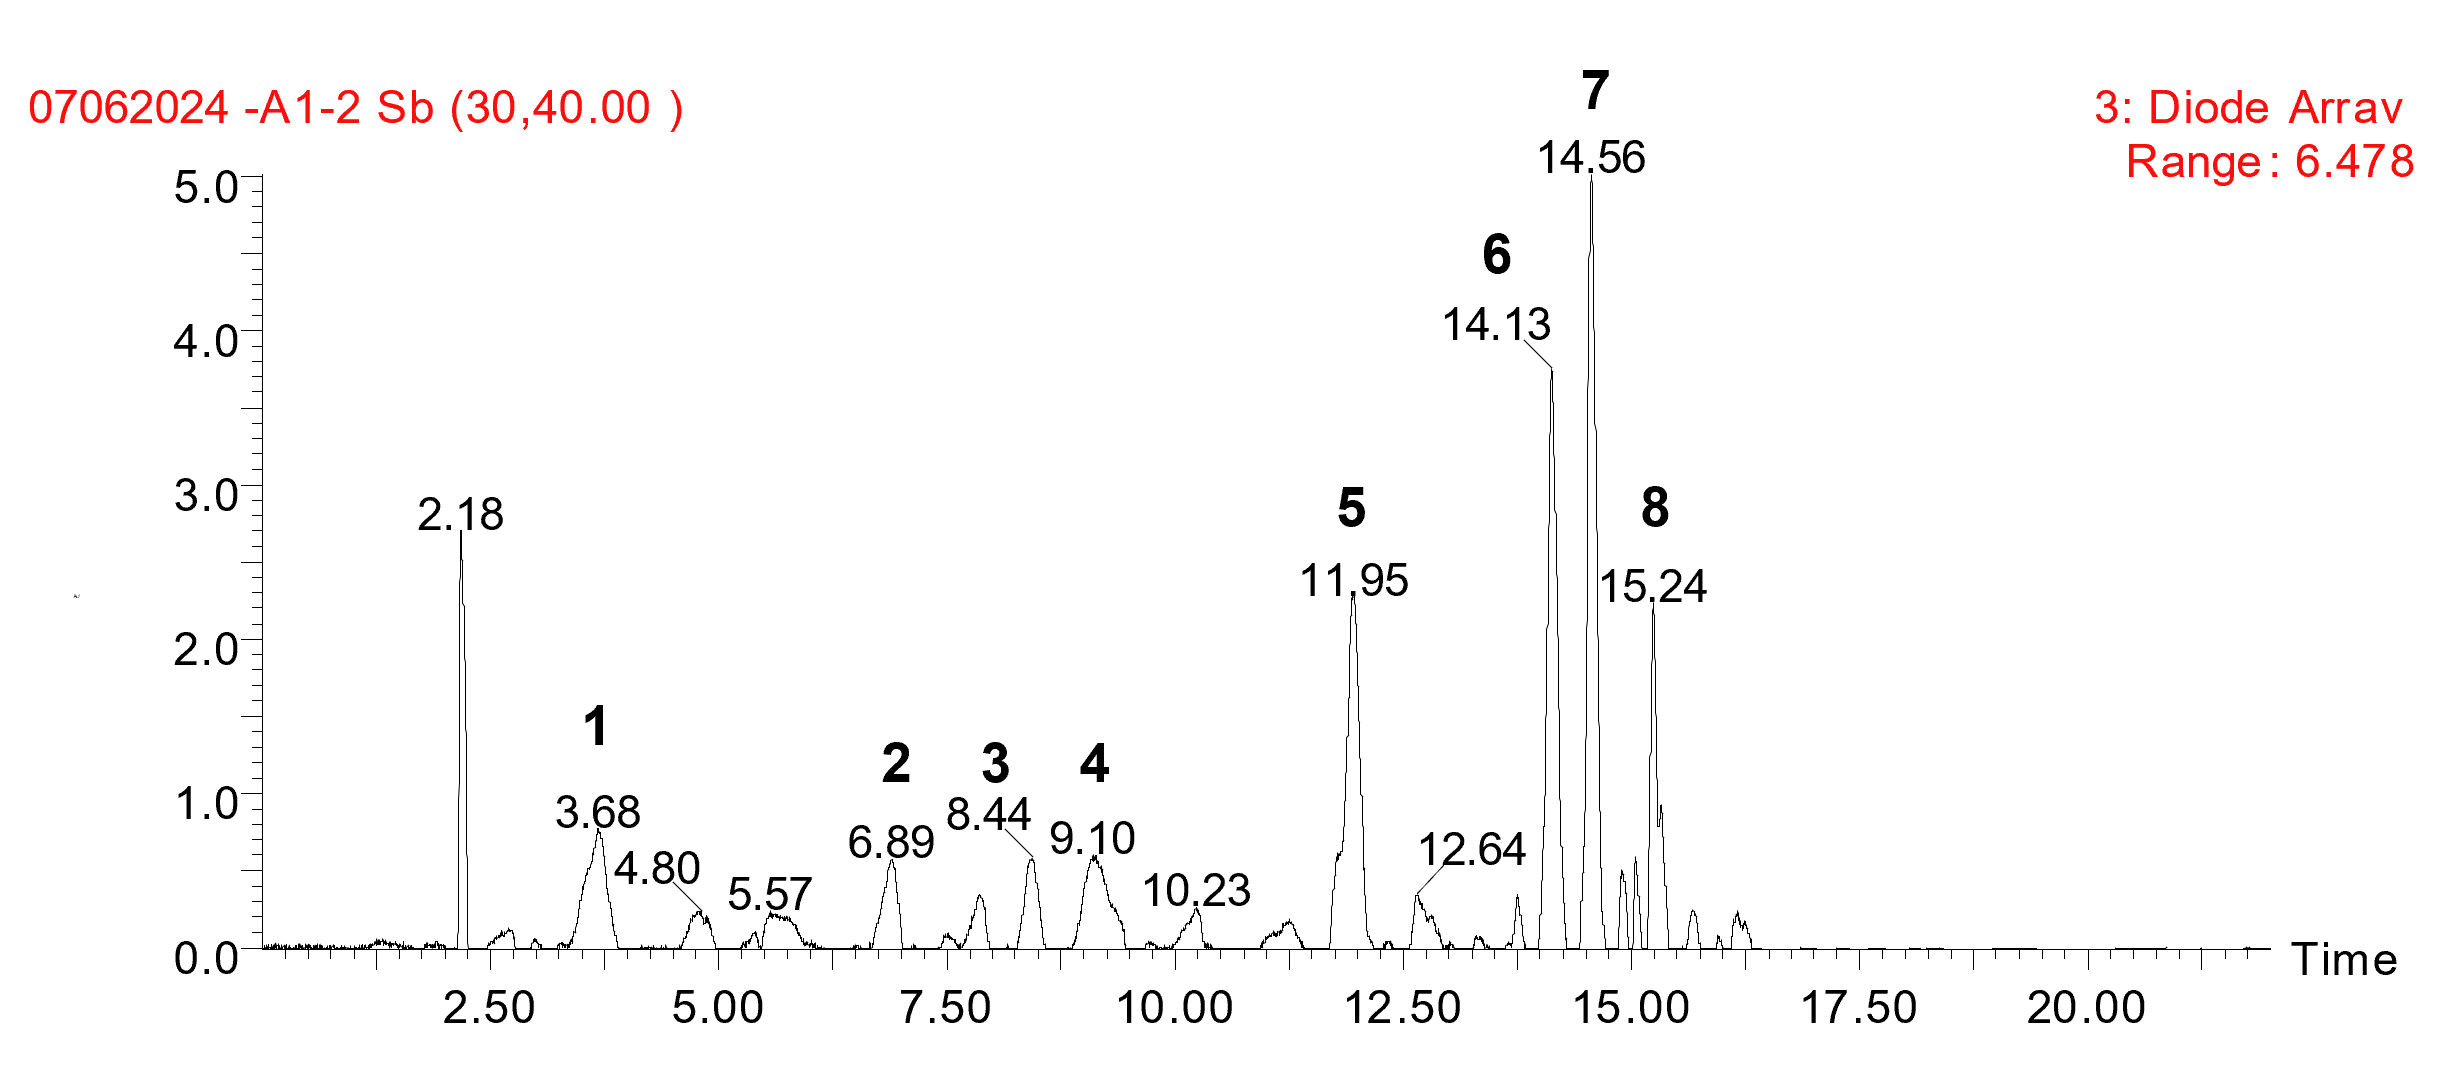


**Figure S2.** PDA chromatogram of the ethanolic crude extract of *A. vera* recorded in full-scan mode (200–700 nm).


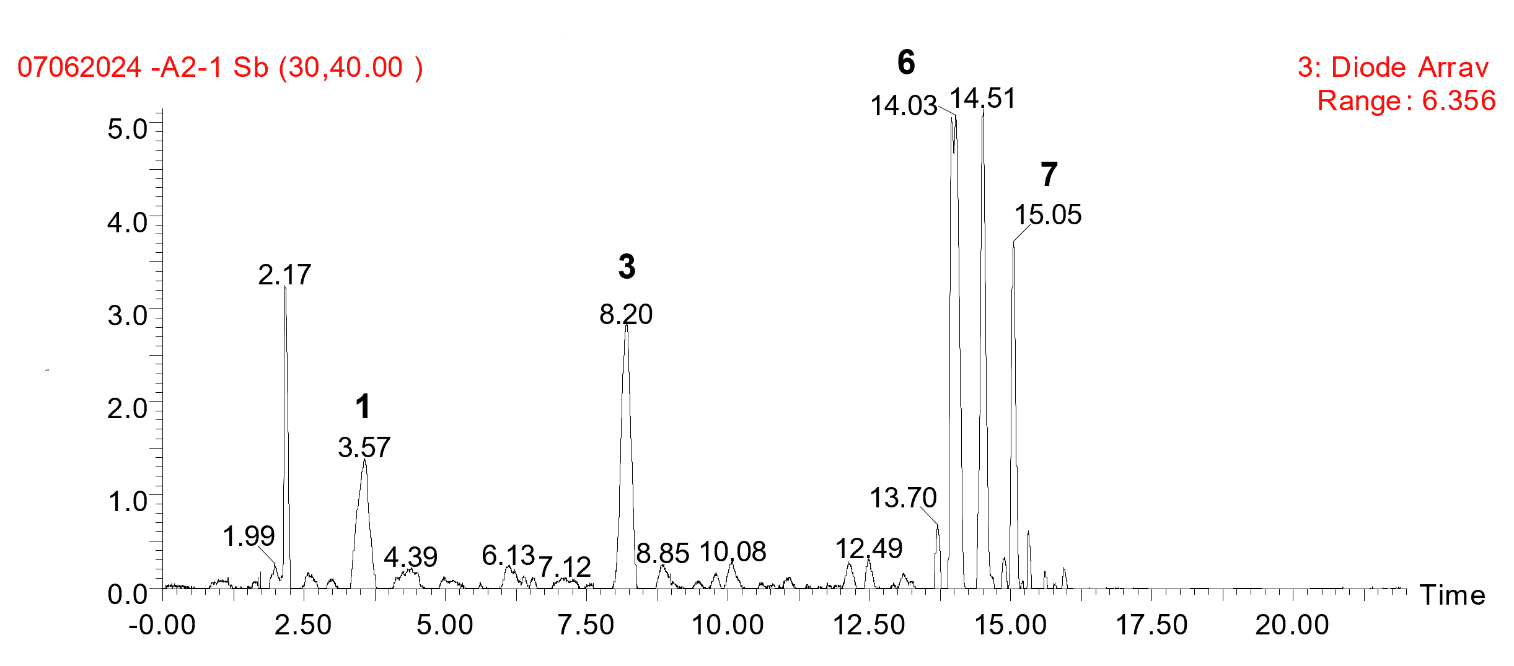


**Figure S3.** PDA chromatogram of the ethanolic crude extract of *A. koenenii* recorded in full-scan mode (200–700 nm).

**Figure S4.** Full-scan ESI(+)-MS chromatogram of the leaf ethanol extract of *A. vera*.

T

i

m

e

0

.

0

0

2

.

5

0

5

.

0

0

7

.

5

0

10

.

0

0

12

.

5

0

15

.

0

0

17

.

5

0

20

.

0

0

%

0

10

0

2

:

S

c

an

ES-

T

I

C

3

.

85e

9

14

.

5

5

14

.

1

1

2

.

0

7

11

.

9

4

8

.

4

0

3

.

6

8

4

.

8

2

6

.

89

5

.

5

7

9

.

1

0

10

.

2

6

12

.

6

3

15

.

2

2

16

.

4

7

17

.

4

8

**1**

**2**

**3**

**4**

**Figure S5**. Full-scan ESI(-)-MS chromatogram of the leaf ethanol extract of *A. vera*.

T

i

m

e

0

.

0

0

2

.

5

0

5

.

0

0

7

.

5

0

10

.

0

0

12

.

5

0

15

.

0

0

17

.

5

0

20

.

0

0

%

0

10

0

1

:

S

c

an

ES

+

T

I

C

1

.

78e1

0

2

.

1

3

14

.

13

8

.

1

6

3

.

2

1

3

.

4

4

4

.

3

4

7

.

0

2

8

.

8

7

12

.

1

6

10

.

0

4

14

.

5

6

15

.

24

16

.

5

0

**6**

**7**

**Figure S6**. Full-scan ESI(+)-MS chromatogram of the leaf ethanol extract of *A. koenenni*.

T

i

m

e

0

.

0

0

2

.

5

0

5

.

0

0

7

.

5

0

10

.

0

0

12

.

5

0

15

.

0

0

17

.

5

0

20

.

0

0

%

0

10

0

2

:

S

c

an

ES-

T

I

C

3

.

97e

9

2

.

1

3

10

.

0

5

12

.

4

8

14

.

56

16

.

4

0

17

.

4

8

3

.

68

**1**

8

.

40

**3**

1

4.

13

**6**

**7**

15

.

24

**Figure S7.** Full-scan ESI(-)-MS chromatogram of the leaf ethanol extract of *A. koenenni*.

**Figure S8.** Product ion spectrum of deprotonated aloesin (**1**) (*m/z* 393) (Ar, Elab = 30 eV, QqQ).

**Scheme S1**. Formation of the product ions of *m/z* 303, 273, 245, and 231 of deprotonated aloesin (**1**) (*m/z* 393).

**Figure S9.** Product ion spectrum of deprotonated homonataloside B (**2**) (*m/z* 593) (Ar, Elab = 30 eV, QqQ).

**Scheme S2**. Formation of the product ions of *m/z* 473, 431, 341, 311, 297, 282, and 269 of deprotonated homonataloside B (**2**) (*m/z* 593).

**Figure S10.** Product ion spectrum of deprotonated 7-hydroxy-8-*O*-methylaloin **(3**) (*m/z* 447) (Ar, Elab = 30 eV, QqQ).

**Scheme S3**. Formation of the product ions of *m/z* 327, 312, and 284 of deprotonated 7-hydroxy-8-*O*-methylaloin (**3**) (*m/z* 447).

**Figure S11.** Product ion spectrum of deprotonated 7-hydroxyaloin A or B (**4**) (*m/z* 433) (Ar, Elab = 30 eV, QqQ).

**Scheme S4**. Formation of the product ions of *m/z* 313 and 270 of deprotonated 7-hydroxyaloin A or B (**4**) (*m/z* 433).

**Figure S12.** Product ion spectrum of protonated isoaloeresin D or aloeresin D (**5**) (*m/z* 557) (Ar, Elab = 30 eV, QqQ).

**Scheme S5**. Formation of the product ions of *m/z* 513, 437, 419, 393, 331, 291, 247, 205, and 147 of protonated isoaloeresin D or aloeresin D (**5**) (*m/z* 557).

**Figure S13.** Product ion spectrum of protonated aloin B (*m/z* 419) (**6**) (Ar, Elab = 30 eV, QqQ).

**Scheme S6**. Formation of the product ions of *m/z* 401, 257, 239, and 211 of protonated aloin B (**6**) (*m/z* 419).

**Figure S14.** Product ion spectrum of protonated aloin A (**7**) (*m/z* 419) (Ar, Elab = 30 eV, QqQ).

**Scheme S7**. Formation of the product ions of *m/z* 401, 257, 239 and 211 of protonated aloin A (**7**) (*m/z* 419).
